# Supplementary material
Source: Research Square preprint supplement (doi:10.21203/rs.3.rs-9051938/v1)
Supplement: Supplementary file 1 [file 4789c3cb341b2754798c7daa.docx]

**Support information**

**Removal of chloroquine phosphate by ultrafine cobalt nanoparticles in peroxymonosulfate activation: A synergy of nonradical and radical pathways**

**2.3. Characterization**

X-ray diffraction (XRD, Rigaku Ultima IV, Japan)was carried out to analyze the crystallization of the materials with Cu-Kα radiation. Scanning Electron Microscopy (SEM, Carl Zeiss Bruker 6/30, Germany) and the high-resolution transmission electron microscopy (HRTEM, JEM-2100, JEOL, Japan) were used to observe the structure and morphology of materials. X-ray photoelectron spectroscopy (XPS, ESCALAB 250Xi, America) was employed to measure the surface chemical state and valence bands. The multi-channel automatic surface area and porosity analyzer (Micromeritics TriStar II 3020, America) was used to determine the surface textural properties of samples. The concentration of P-Nip was monitored by UV–vis spectra (P4, MAPADA, Shanghai).

**2.4. Evaluation of catalytic performance**

The 300 W Xenon lamp was used in the whole photocatalytic degradation. Briefly, 10 mg of the catalyst was added into 50 mg/L of CQP solution with magnetic stirring in the dark box for adsorption equilibrium (20 min). Additionally, the 1 mmol of PMS was added into above solution to initiate the reaction under visible light irradiation. At 1 min interval, 3 mL of CQP solution was withdrawn with disposable syringe and separated immediately with the 0.22 μm polytetrafluoroethylene film. The concentration of CQP was monitored by UV–vis spectra (P4, MAPADA, Shanghai). The light harvesting ability of the samples was evaluated by diffuse reflectance spectroscopy (DRS, Shimadzu UV-2550). The contribution of the reactive oxygen species was further evaluated by the free radical trapping experiments (FRTEs). IPA, PBQ, FFA, and MeOH were used as scavengers in the FRTEs. In the EPR experiments, 5,5-dimethyl-1-pyrrolinedine-N-oxide (DMPO) and 2,2,6,6-tetramethyl-4-piperidone (TEMP) were applied as the spin-trapping agent for SO4• −, •OH, O2• − and 1O2, respectively. The deionized water, tap water, river water and reservoir water were used to evaluate the applications of catalyst in approximate real wastewater. Furthermore, the effect of inorganic anions (Cl–, HCO3–, CO32–, NO3–, SO42–, H2PO4– and HPO42–) and cation (Na+, K+, Ca2+, Cu2+, Zn2+ and Mg2+) on removal efficiency of CQP were investigated. The catalytic degradation of three kinds of antibiotics mixture (50 mg/L for CQP, TC, and OTC) and four kinds of dyes mixture (DH, CR, MB, and MY)) were investigated with the same methods. The degradation percentage was calculated by the intensity of characteristic absorption peak. The photocatalytic degradation experiments were performed using HSX-F300 Xenon lamp source (Beijing NBeT Technology Co., Ltd., China). The experiments were repeated three times in the same procedure, and which were depicted with mean values with the error bar. At last, the recyclability of the catalysts and leaching copper ions were investigated, and methods were provided in supporting information.

**2.5. Computational details**

Density functional theory calculations were performed utilizing the Vienna Ab initio Simulation Package with the projector augmented wave method. The exchange-correlation interactions were treated using the spin-polarized Perdew-Burke-Ernzerhof functional. A 2×2×1 supercell model of Co/NC was constructed by combining the Co (111) crystal plane and the N-doped C (001) plane with an N:C atomic ratio of 1:8.

All computations were conducted under spin-polarized conditions. A plane-wave basis set with a cutoff energy of 450 eV and appropriate k-point meshes were employed to ensure convergence of the total ground-state energy. Structural optimizations were performed until the forces on all relaxed atoms were below 0.02 eV∙Å-1. For optimizing both geometry and lattice parameters, Brillouin zone integration was carried out using a 2×2×1 Gamma-Pack k-point grid. A denser 1×1×1 Gamma-Pack k-point sampling was adopted for density of states calculations. The energy convergence threshold for self-consistent field iterations was set to 10-5 eV during structural relaxation. Equilibrium geometries and lattice constants were obtained when the maximum stress on any atom fell below 0.02 eV∙Å-1. Input and output files for elastic modulus calculations, including charge density differences, were managed using the VASPKIT toolkit.

The adsorption energy of peracetic acid on the catalyst surface was calculated as:

Eads = Etotal – ECo/NC – EPMS

where Etotal represents the total energy of the peracetic acid-adsorbed system, ECo/NC denotes the energy of the pristine catalyst, and EPMS corresponds to the energy of an isolated peracetic acid molecule. More negative values indicate stronger adsorption capability.

**Fig. 1S**. N2 adsorption-desorption isotherm (Inset: the distribution of pore size).

**Fig. 2S**. The effects of sample dehydration degree: (a) 0%, (b) 75%, and (c) 100%.

**Table 1S.** Laplacian bond order (LBO) size of the main chemical band of CQP.

| Chemical band | LBO size |
| --- | --- |
| 1(C)-2(C) | 1.6132 |
| 1(C)-6(C) | 1.3927 |
| 1(C)-44(H) | 0.7962 |
| 2(C)-3(C) | 1.4439 |
| 2(C)-43(H) | 0.8075 |
| 3(C)-4(C) | 1.6320 |
| 3(C)-48(Cl) | 0.5324 |
| 4(C)-5(C) | 1.4248 |
| 4(C)-45(H) | 0.8002 |
| 5(C)-6(C) | 1.3473 |
| 5(C)-10(N) | 1.1453 |
| 6(C)-7(C) | 1.2917 |
| 7(C)-8(C) | 1.5448 |
| 7(C)-11(N) | 1.0474 |
| 8(C)-9(C) | 1.4910 |
| 8(C)-46(H) | 0.7917 |
| 9(C)-10(N) | 1.3986 |
| 9(C)-47(H) | 0.8151 |
| 11(N)-12(C) | 0.6882 |
| 11(N)-42(H) | 0.7083 |
| 12(C)-13(C) | 1.0328 |
| 12(C)-17(C) | 0.9765 |
| 12(C)-18(H) | 0.7912 |
| 13(C)-14(H) | 0.7872 |
| 13(C)-15(H) | 0.7921 |
| 13(C)-16(H) | 0.7740 |
| 17(C)-19(C) | 0.9764 |
| 17(C)-20(H) | 0.7767 |
| 17(C)-21(H) | 0.7659 |
| 19(C)-22(C) | 0.9730 |
| 19(C)-23(H) | 0.7820 |
| 19(C)-24(H) | 0.7743 |
| 22(C)-25(N) | 0.7325 |
| 22(C)-26(H) | 0.7983 |
| 22(C)-27(H) | 0.7903 |
| 25(N)-28(C) | 0.7326 |
| 25(N)-35(C) | 0.7368 |
| 28(C)-29(C) | 1.0460 |
| 28(C)-30(H) | 0.7900 |
| 28(C)-31(H) | 0.7623 |
| 29(C)-32(H) | 0.7931 |
| 29(C)-33(H) | 0.7830 |
| 29(C)-34(H) | 0.7916 |
| 35(C)-36(C) | 1.0481 |
| 35(C)-37(H) | 0.7999 |
| 35(C)-38(H) | 0.7600 |
| 36(C)-39(H) | 0.7905 |
| 36(C)-40(H) | 0.7802 |
| 36(C)-41(H) | 0.7907 |

**Table 2S**. The degradation efficiency of the mixture in different water matrices.

| Pollutants | Degradation efficiency (%) | | | |
| --- | --- | --- | --- | --- |
| De-W | Ta-W | Re-W | Ri-W |
| CQP | 99.99 | 99.99 | 97.60 | 95.00 |
| TC | 99.99 | 99.99 | 98.50 | 97.10 |
| DH | 99.99 | 99.99 | 99.99 | 96.00 |
| OTC | 99.99 | 99.99 | 98.20 | 94.8 |
| CR | 99.99 | 99.99 | 99.99 | 99.99 |
| MO | 99.99 | 99.99 | 99.99 | 99.99 |
| MB | 99.99 | 99.99 | 99.99 | 99.99 |
| MY | 99.99 | 99.99 | 99.99 | 99.99 |

**Table 3S.** Economic analysis of Co@NC

| Items | Cost ($)/Kg |
| --- | --- |
| Reagent | 0.26 |
| Raw materials | 5.15 |
| Energy | 3.43 |
